# Supplementary material for: Leucine and Arginine Availability Modulate Mouse Embryonic Stem Cell Proliferation and Metabolism
Source: MDPI journal article supplement (doi:10.3390/ijms232214286), 2022-11-18

## Supplementary material

# Leucine and Arginine Availability Modulate Mouse Embryonic Stem Cell Proliferation and Metabolism

Bibiana Correia <sup>1,2</sup>, Maria Inês Sousa <sup>1,2</sup>, Ana Filipa Branco <sup>2</sup>, Ana Sofia Rodrigues <sup>2</sup> and João Ramalho-Santos <sup>1,2,\*</sup>

<sup>1</sup> Department of Life Sciences, University of Coimbra, Calçada Martim de Freitas, 3000-456 Coimbra, Portugal

<sup>2</sup> CNC—Center for Neuroscience and Cell Biology, CIBB, University of Coimbra, Azinhaga de Santa Comba, Polo 3, 3000-354 Coimbra, Portugal

\* Correspondence: jramalho@uc.pt

**Appendix SA. Original blot membranes of c-MYC labeling and its respective CALNEXIN**

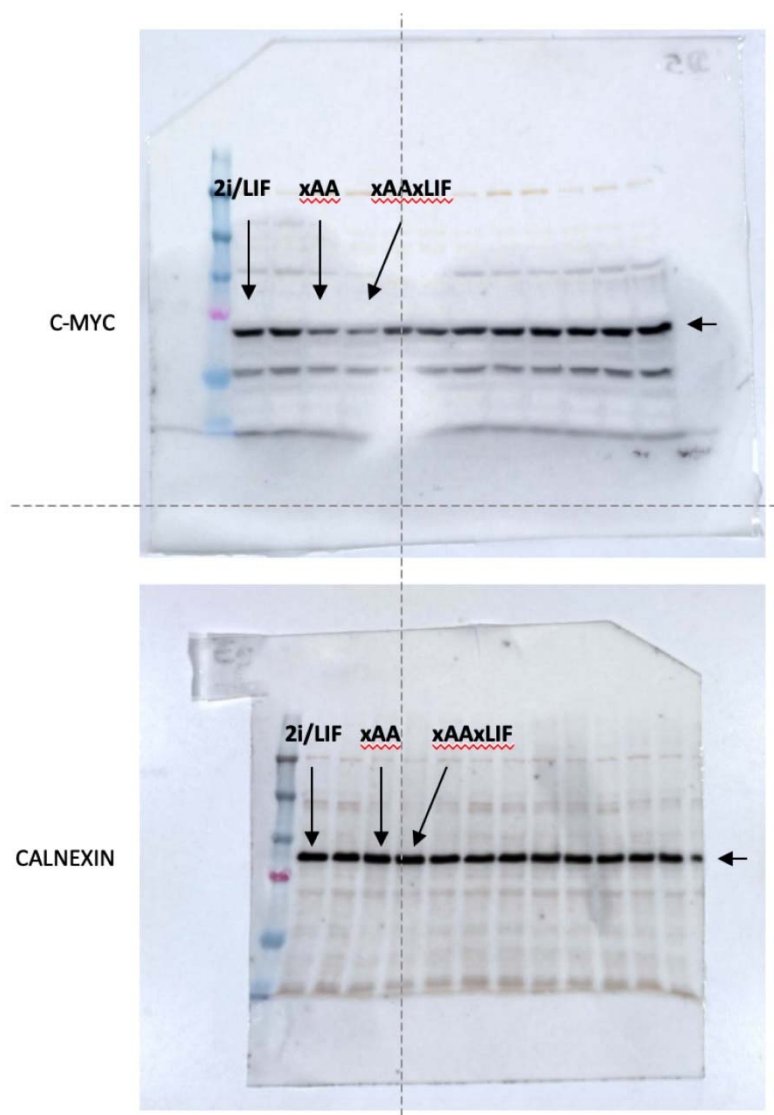

Appendix SB. Original blot membranes of COXIV labeling and its respective CALNEXIN.

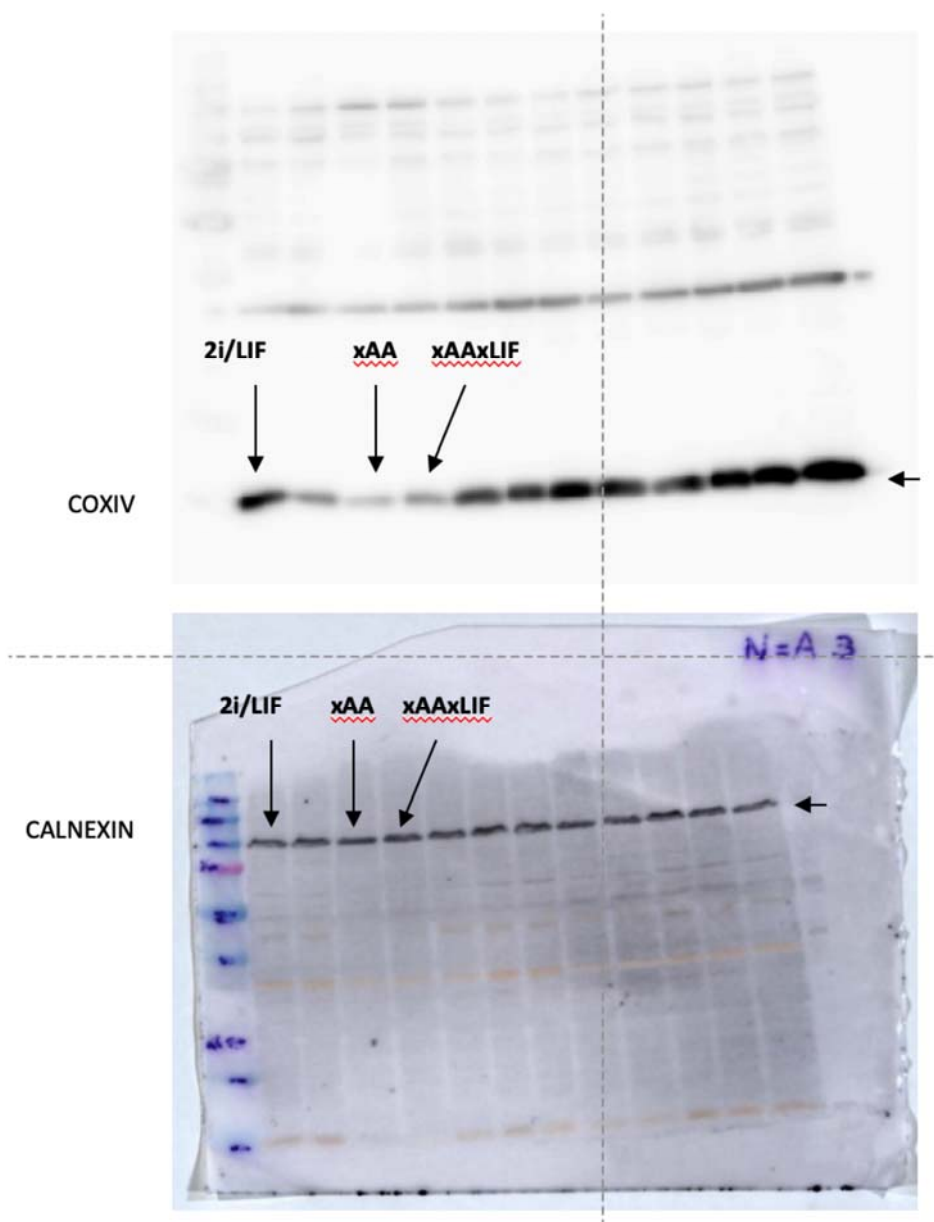

Supplement: s1 [file s1]
